# Supplementary material for: Coupling Multi-Angle Light Scattering to Reverse-Phase Ultra-High-Pressure Chromatography (RP-UPLC-MALS) for the characterization monoclonal antibodies
Source: PubMed Central journal article supplement (PMC6800455; doi:10.1038/s41598-019-51233-6), 2019-10-18
Supplement: 41598_2019_51233_MOESM1_ESM.pdf [file 41598_2019_51233_MOESM1_ESM.pdf]

## Supplementary information for

### Coupling Multi-Angle Light Scattering to **Reverse-Phase** Ultra-High-Pressure Chromatography (**RP-UPLC-MALS**) for the characterization of monoclonal antibody

Lorenzo Gentiluomo, Vanessa Schneider, Dierk Roessner, Wolfgang Frieß

#### The file includes:

- SI 1. PPI-8, PPI-13 & PPI-17 **RP-UPLC-MALS** Chromatograms
- SI 2. PPI-18 **RP-UPLC-MALS** Chromatogram
- SI 3. Fab & Fc SEC-MALS Chromatograms
- SI 4. Formulations list for long term stability studies
- SI 5. Purity data (i.e. cIEF and SEC) of the protein bulk

## Supplementary information

SI 1. RP-UPLC-MALS of PPI-8, PPI-13 & PPI-17. MALS results confirmed the absence of oligomers for PPI-8, PPI-13 and PPI-17.

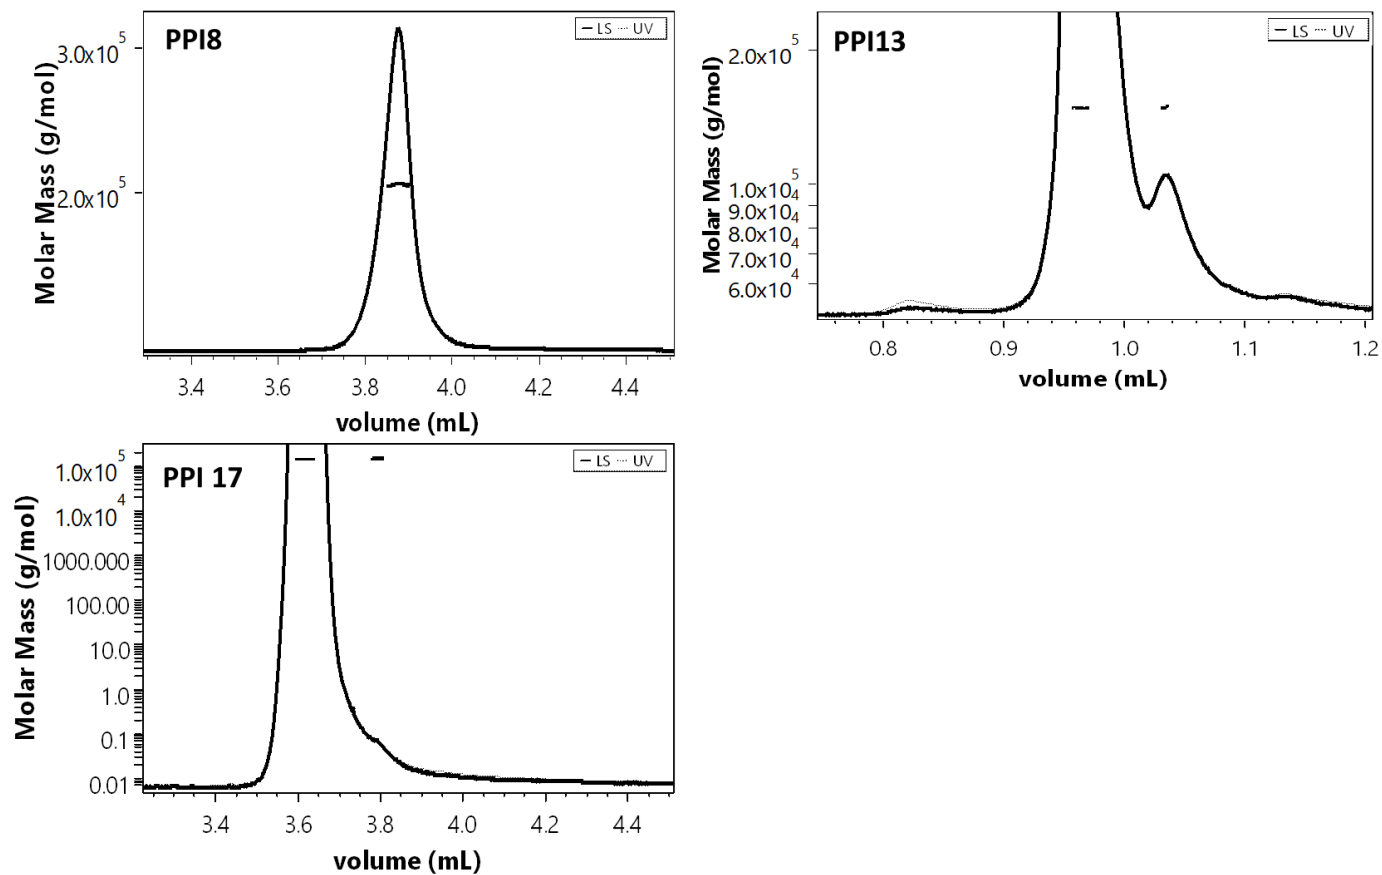

SI 2. RP-UPLC-MALS of PPI-18. MALS results confirmed the presence of oligomers for PPI18.

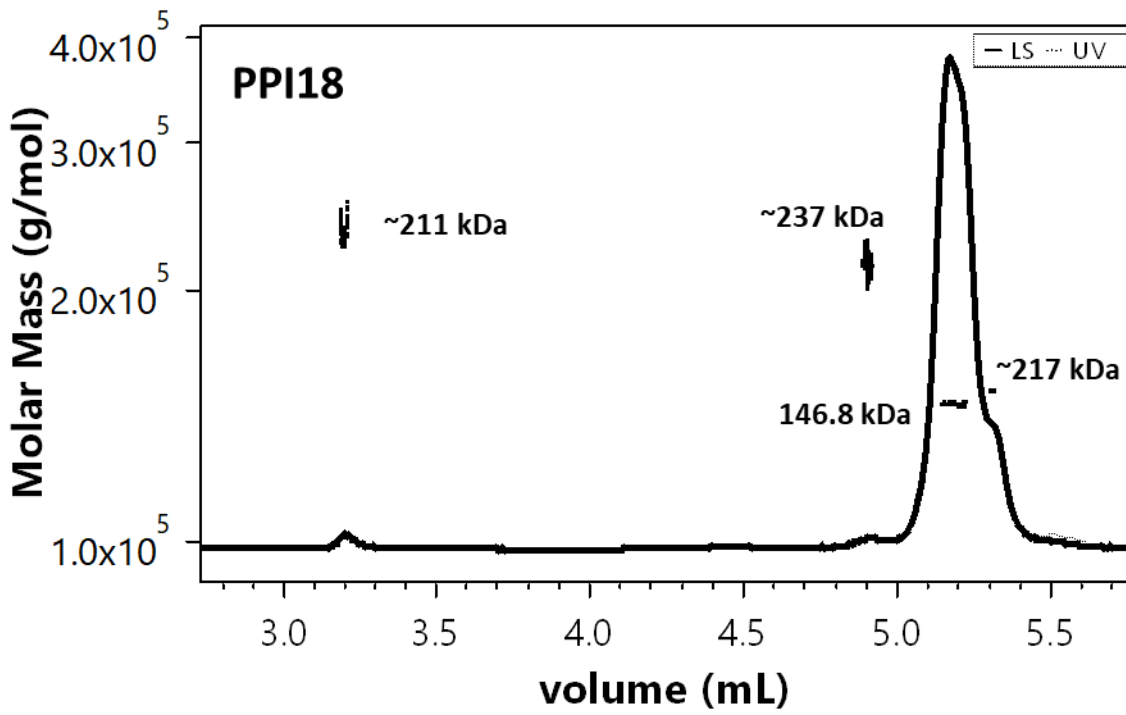

SI 3. SEC-MALS of PPI-1 Fc and Fab fragments. PPI1 Fc fragment and PPI1 Fc fragment are plotted in blue, and red lines, respectively.

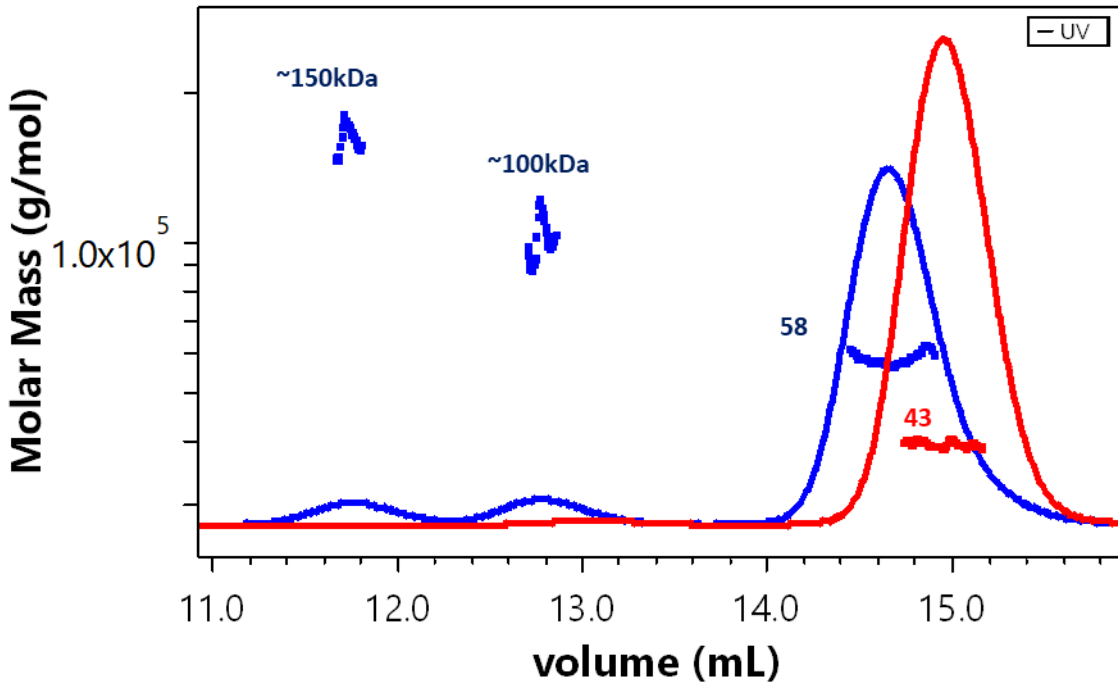

**SI 4.** Long-term formulations list. Formulations list for long term stability studies

| <b>Formulation</b> | <b>Buffer</b>   | <b>pH</b> | <b>Excipient</b> | <b>Salt</b> |
|--------------------|-----------------|-----------|------------------|-------------|
| A                  | 10 mM Histidine | 5         | -                | -           |
| B                  | 10 mM Acetate   | 5         | -                | -           |
| C                  | 10 mM Histidine | 6.5       | 280 mM Proline   | -           |
| D                  | 10 mM Histidine | 6.5       | 140 mM ArgHCl    | -           |
| E                  | 10 mM Histidine | 6.5       | 280 mM Sucroce   | -           |
| F                  | 10 mM Histidine | 6.5       | -                | -           |
| G                  | 10 mM Histidine | 6.5       | -                | 140 mM NaCl |
| H                  | 10 mM Phosphate | 6.5       | -                | -           |

SI 5 Purity data. cIEF and SEC results of the protein bulk (i.e. before formulating).

| <b>Method</b> | <b>cIEF</b>          | <b>SEC</b>                |
|---------------|----------------------|---------------------------|
| Protein       | Isoelectric point Ip | Monomer mass fraction (%) |
| PPI-01        | 7.2                  | 99.7                      |
| PPI-02        | 9.2 – 9.3            | 98.3                      |
| PPI-03        | 9.3 – 9.4            | 99.8                      |
| PPI-04        | 8.8 – 9.0            | 99.1                      |
| PPI-08        | 9.0 – 9.2            | 99.7                      |
| PPI-10        | 8.9 – 9.2            | 96.3                      |
| PPI-13        | 8.8 – 8.9            | 99.4                      |
| PPI-17        | 8.9 – 9.1            | 98.5                      |
| PPI-18        | 5.2 – 5.6            | 98.3                      |
| PPI-30        | 6.2                  | 100                       |
